# Supplementary material for: TAX1BP1 limits macrophage-myofibroblastlast transition in lupus kidney fibrosis
Source: Research Square preprint supplement (doi:10.21203/rs.3.rs-7699737/v1), 2025-10-16
Supplement: Supplementary file 1 [file 41038a1b0687bd28e45321e7.docx]

Key Message

• In MRL/lpr mice, AAV-mediated TAX1BP1 overexpression in proximal tubule cells reduced proteinuria, serum anti-dsDNA, creatinine and histological fibrosis.

• Single-cell RNA-seq and immunofluorescence demonstrated TAX1BP1-induced suppression of Gal-3 and α-SMA in infiltrating CD68⁺ macrophages, indicating MMT inhibition.

• TGF-β1/Smad3 signaling was markedly attenuated, linking TAX1BP1 to canonical fibrosis pathways.

This study is the first to identify the TAX1BP1–Gal-3–MMT axis as a novel therapeutic target against fibrosis in lupus nephritis.
