# Supplementary material for: TAX1BP1 limits macrophage-myofibroblastlast transition in lupus kidney fibrosis
Source: Research Square preprint supplement (doi:10.21203/rs.3.rs-7699737/v1), 2025-10-16
Supplement: Supplementary file 2 [file 47c47d6bb237819448252b9a.docx]

| **Antibody** | **Supplier/Manufacturer** |
| --- | --- |
| IKBα | Abcam (US, Cat. No. AB32518) |
| GAPDH | Zenbio (Chengdu, China, Cat. No. R380626) |
| TAX1BP1 | Abcam (US, Cat. No. AB26997) |
| Gal-3 | Proteintech (Wuhan, China, Cat. No. 2024-1-RR) |
| Smad3 | Zenbio (Chengdu, China, Cat. No. R25743) |
| TGF-β | Abcam (US, Cat. No. AB215175) |
| α-Tubulin | Zenbio (Chengdu, China, Cat. No. R23452) |
| NF-κB p65 | Zenbio (Chengdu, China, Cat. No. R380172) |
| HRP-Goat Anti-Rabbit | Elabscience (Wuhan, China, Cat. No. E-AB-1001) |
| HRP-Goat Anti-Mouse | Elabscience (Wuhan, China, Cat. No. E-AB-1003) |
